# Supplementary material
Source: PubMed Central journal article supplement (PMC7486761)
Supplement: pnas.2004363117.sapp.pdf [file pnas.2004363117.sapp.pdf]

Table S1: Early Poverty Predicting Hormones, Hippocampal Volume, Emotion Dysregulation and Depression Controlling for Early Depression

| Outcome Variable              | Prediction from T1 Income-to-Needs in Step 1 with T1 Depression as a Covariate |              |              |          |          |                      | Prediction from Interaction between T1 Income-to-Needs and sex in Step 2 with T1 Depression as a Covariate |              |              |          |          |                      |
|-------------------------------|--------------------------------------------------------------------------------|--------------|--------------|----------|----------|----------------------|------------------------------------------------------------------------------------------------------------|--------------|--------------|----------|----------|----------------------|
|                               | B                                                                              | Lower 95% CI | Upper 95% CI | <i>t</i> | <i>p</i> | <i>R2</i> Adj Step 1 | B                                                                                                          | Lower 95% CI | Upper 95% CI | <i>t</i> | <i>p</i> | <i>R2</i> Adj Step 2 |
| Testosterone Slope            | .073                                                                           | .0076        | .140         | 2.18     | .031     | .843                 | .052                                                                                                       | -.012        | .117         | 1.60     | .112     | ..844                |
| Hippocampal Slope             | .236                                                                           | .08          | .393         | 2.98     | .003     | .066                 | .061                                                                                                       | -.137        | .036         | -1.15    | .253     | .063                 |
| T9 Emotion Dysregulation      | -.284                                                                          | -.449        | -.119        | -3.40    | .001     | .196                 | -.114                                                                                                      | -.275        | .047         | -1.41    | .163     | .203                 |
| T9 Child Depression Inventory | -.189                                                                          | -.369        | -.008        | -2.07    | .041     | .076                 | -.147                                                                                                      | -.323        | .029         | -1.65    | .101     | .090                 |

Table S2: Early Poverty Predicting Hormones, Hippocampal Volume, Emotion Dysregulation and Depression Controlling for Pubertal Status at T9

| Outcome Variable              | Prediction from T1 Income-to-Needs in Step 1 with T9 Pubertal Status as a Covariate |              |              |          |          |                                  | Prediction from Interaction between T1 Income-to-Needs and sex in Step 2 with T9 Pubertal Status as a Covariate |              |              |          |          |                                  |
|-------------------------------|-------------------------------------------------------------------------------------|--------------|--------------|----------|----------|----------------------------------|-----------------------------------------------------------------------------------------------------------------|--------------|--------------|----------|----------|----------------------------------|
|                               | B                                                                                   | Lower 95% CI | Upper 95% CI | <i>t</i> | <i>p</i> | <i>R</i> <sup>2</sup> Adj Step 1 | B                                                                                                               | Lower 95% CI | Upper 95% CI | <i>t</i> | <i>p</i> | <i>R</i> <sup>2</sup> Adj Step 2 |
| Testosterone Slope            | .082                                                                                | .012         | .152         | 2.32     | .022     | .827                             | .053                                                                                                            | -.016        | .122         | 1.53     | .129     | .829                             |
| Hippocampal Slope             | .280                                                                                | .115         | .445         | 3.35     | .001     | .061                             | .019                                                                                                            | -.145        | .183         | 0.23     | .820     | .054                             |
| T9 Emotion Dysregulation      | -.352                                                                               | -.514        | -.190        | -4.29    | <.001    | .097                             | -.087                                                                                                           | -.247        | .074         | -1.07    | .289     | .098                             |
| T9 Child Depression Inventory | -.244                                                                               | -.411        | -.077        | -2.89    | .005     | .074                             | -.141                                                                                                           | -.307        | .024         | -1.69    | .093     | .087                             |

Table S3: Early Poverty Predicting Amygdala, Caudate, Dorsal Anterior Cingulate, and Dorsolateral Prefrontal Volumes

| Outcome Variable                     | Prediction from T1 Income-to-Needs in Step 1 |              |              |          |          |                                  | Prediction from Interaction between T1 Income-to-Needs and Sex in Step 2 |              |              |          |          |                                  |
|--------------------------------------|----------------------------------------------|--------------|--------------|----------|----------|----------------------------------|--------------------------------------------------------------------------|--------------|--------------|----------|----------|----------------------------------|
|                                      | B                                            | Lower 95% CI | Upper 95% CI | <i>t</i> | <i>p</i> | <i>R</i> <sup>2</sup> Adj Step 1 | B                                                                        | Lower 95% CI | Upper 95% CI | <i>t</i> | <i>p</i> | <i>R</i> <sup>2</sup> Adj Step 2 |
| Amygdala Slope                       | .029                                         | -.126        | .185         | .371     | .711     | .006                             | -.108                                                                    | -.264        | .047         | -1.38    | .171     | .001                             |
| Caudate Slope                        | -.058                                        | -.217        | .102         | -.714    | .476     | .004                             | -.065                                                                    | -.225        | .095         | -.801    | .424     | .002                             |
| Dorsal Anterior Cingulate Slope      | -.036                                        | -.194        | .121         | 0.453    | .651     | .005                             | .059                                                                     | -.100        | .217         | 0.731    | .466     | .003                             |
| Dorsolateral Prefrontal Cortex Slope | -.082                                        | -.240        | .076         | -1.02    | .309     | .005                             | -.079                                                                    | -.237        | .079         | -.982    | .327     | .007                             |

FDR Adjusted *p*s \* $<.05$ ; \*\*  $<.01$ , \*\*\* $<.005$

Table S4: Testosterone Slopes Predicting Amygdala, Caudate, Dorsal Anterior Cingulate, and Dorsolateral Prefrontal Volumes

| Outcome Variable                     | Prediction from Testosterone Slope in Step 1 |              |              |          |             |                                  | Prediction from Interaction between Testosterone Slope and Sex in Step 2 |              |              |          |          |                                  |
|--------------------------------------|----------------------------------------------|--------------|--------------|----------|-------------|----------------------------------|--------------------------------------------------------------------------|--------------|--------------|----------|----------|----------------------------------|
|                                      | B                                            | Lower 95% CI | Upper 95% CI | <i>t</i> | <i>p</i>    | <i>R</i> <sup>2</sup> Adj Step 1 | B                                                                        | Lower 95% CI | Upper 95% CI | <i>t</i> | <i>p</i> | <i>R</i> <sup>2</sup> Adj Step 2 |
| Amygdala Slope                       | -.085                                        | -.474        | .303         | -0.43    | <b>.665</b> | -.007                            | 1.36                                                                     | -.166        | 2.886        | 1.76     | .08      | .005                             |
| Caudate Slope                        | .058                                         | -.347        | .463         | .284     | .777        | .002                             | -1.01                                                                    | -2.61        | .591         | -1.25    | .215     | .002                             |
| Dorsal Anterior Cingulate Slope      | .208                                         | -.187        | .603         | 1.04     | .299        | .010                             | -.629                                                                    | -2.19        | .933         | -.795    | .428     | .008                             |
| Dorsolateral Prefrontal Cortex Slope | .092                                         | -.290        | .475         | 0.48     | .634        | .010                             | -1.23                                                                    | -2.74        | .272         | -1.62    | .108     | .010                             |

FDR Adjusted *p*s \*<.05; \*\* < .01, \*\*\*<.005

### Supplemental Figure Captions

**Figure S1. Study Flow:** MRI 2 was approx. 18 months after MRI 1, MRI 3 was 15 months after MRI 2, MRI 4 was 41 months after MRI 3 (due to time between grant cycles)

**Figure S2: Results of Serial Mediation Model Between Early Poverty and Adolescent Depression Controlling for Early Depression.** The top of the figure illustrates the components of the serial mediation model using the Hayes notation. The chart at the bottom illustrates all of the individually significant indirect effects.

**Figure S3: Results of Serial Mediation Model Between Early Poverty and Adolescent Depression Controlling for T9 Pubertal Status.** The top of the figure illustrates the components of the serial mediation model using the Hayes notation. The chart at the bottom illustrates all of the individually significant indirect effects.

**Figure S4. Results of Serial Mediation Model Between Early Poverty and Adolescent Depression Using MRI3 Emotion Dysregulation.** The top of the figure illustrates the components of the serial mediation model using the Hayes notation. The chart at the bottom illustrates all of the individually significant indirect effects

## Preschool Depression Study (PDS) Flowchart

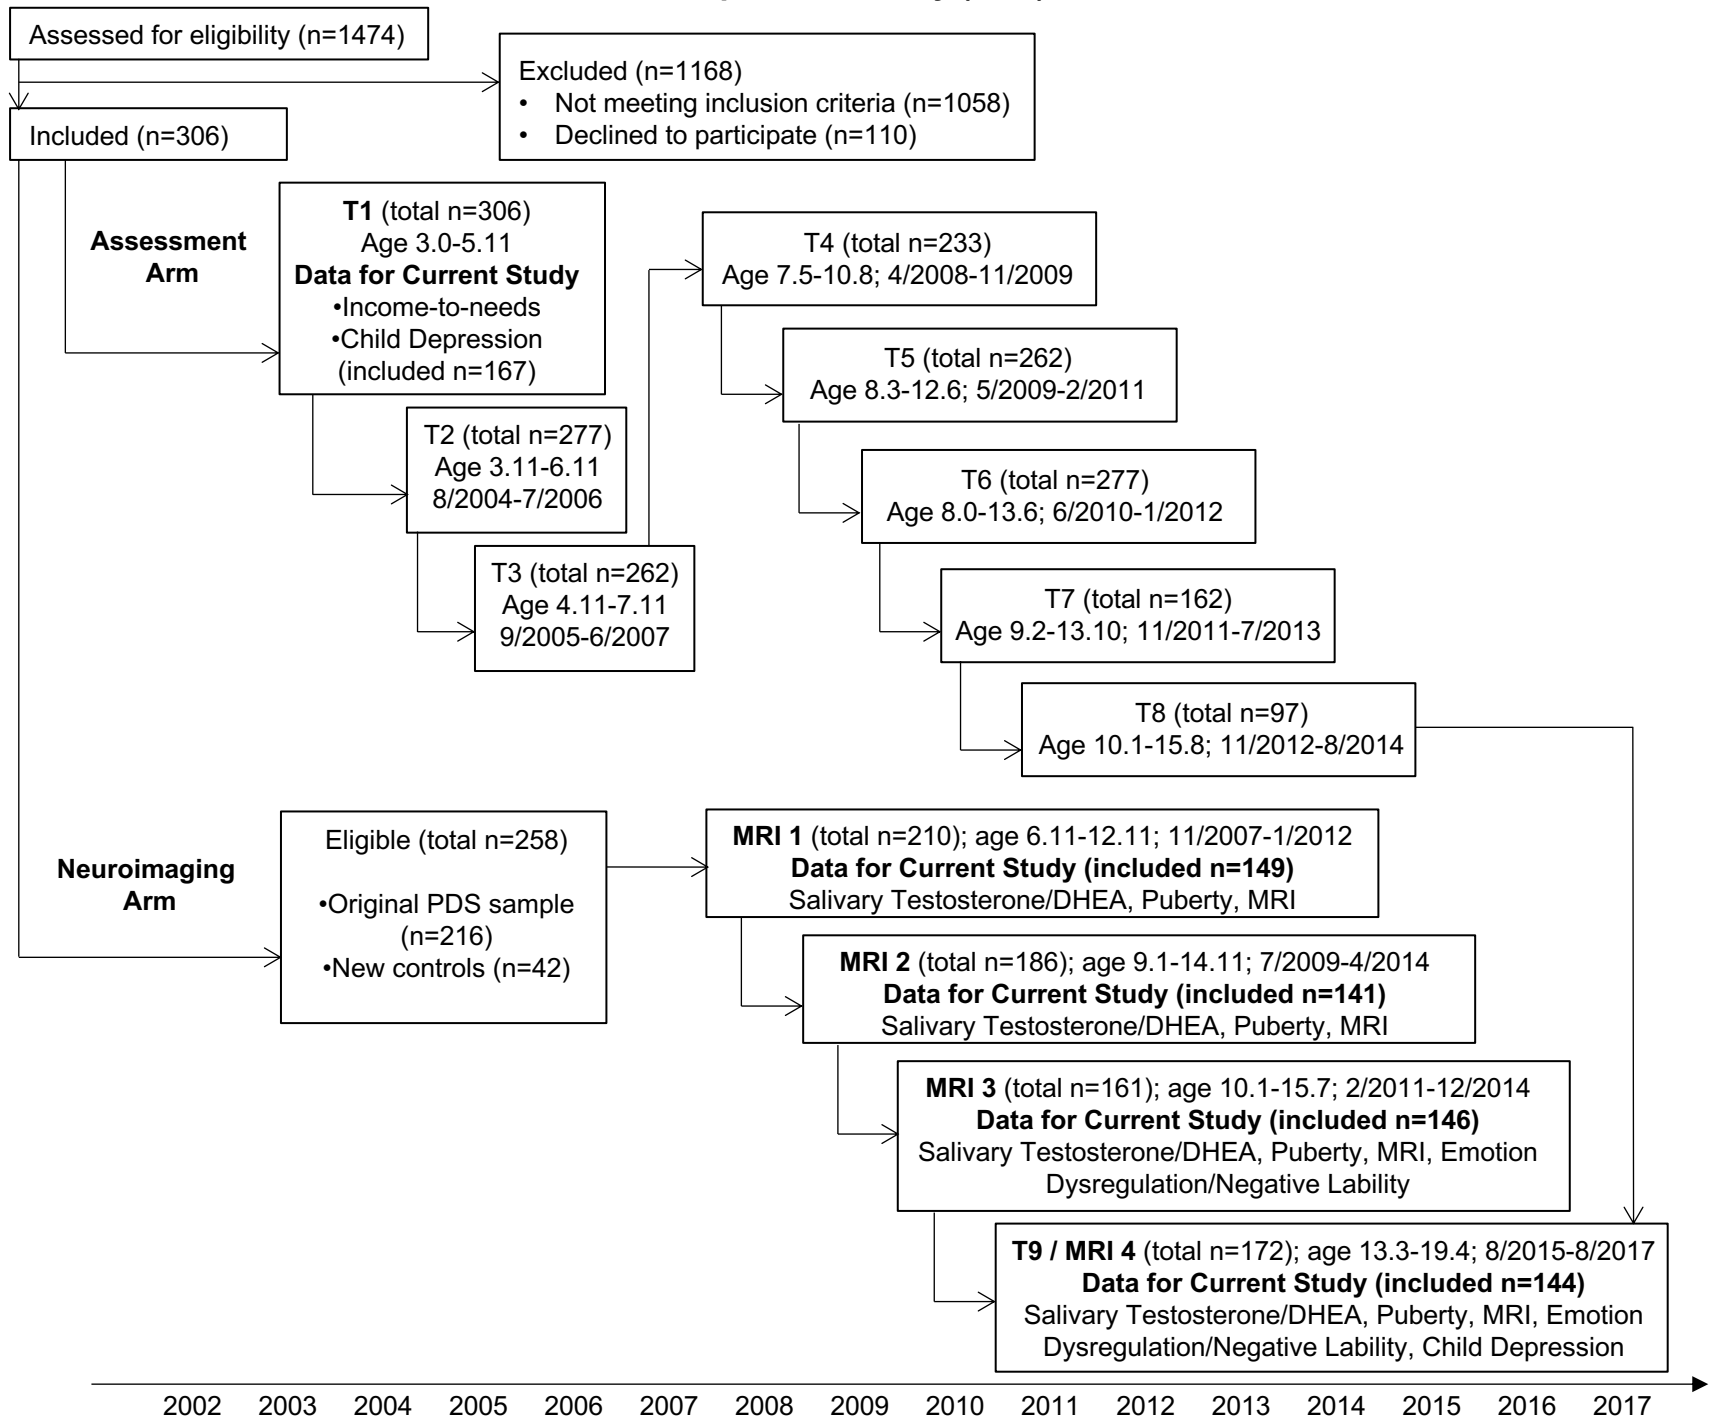

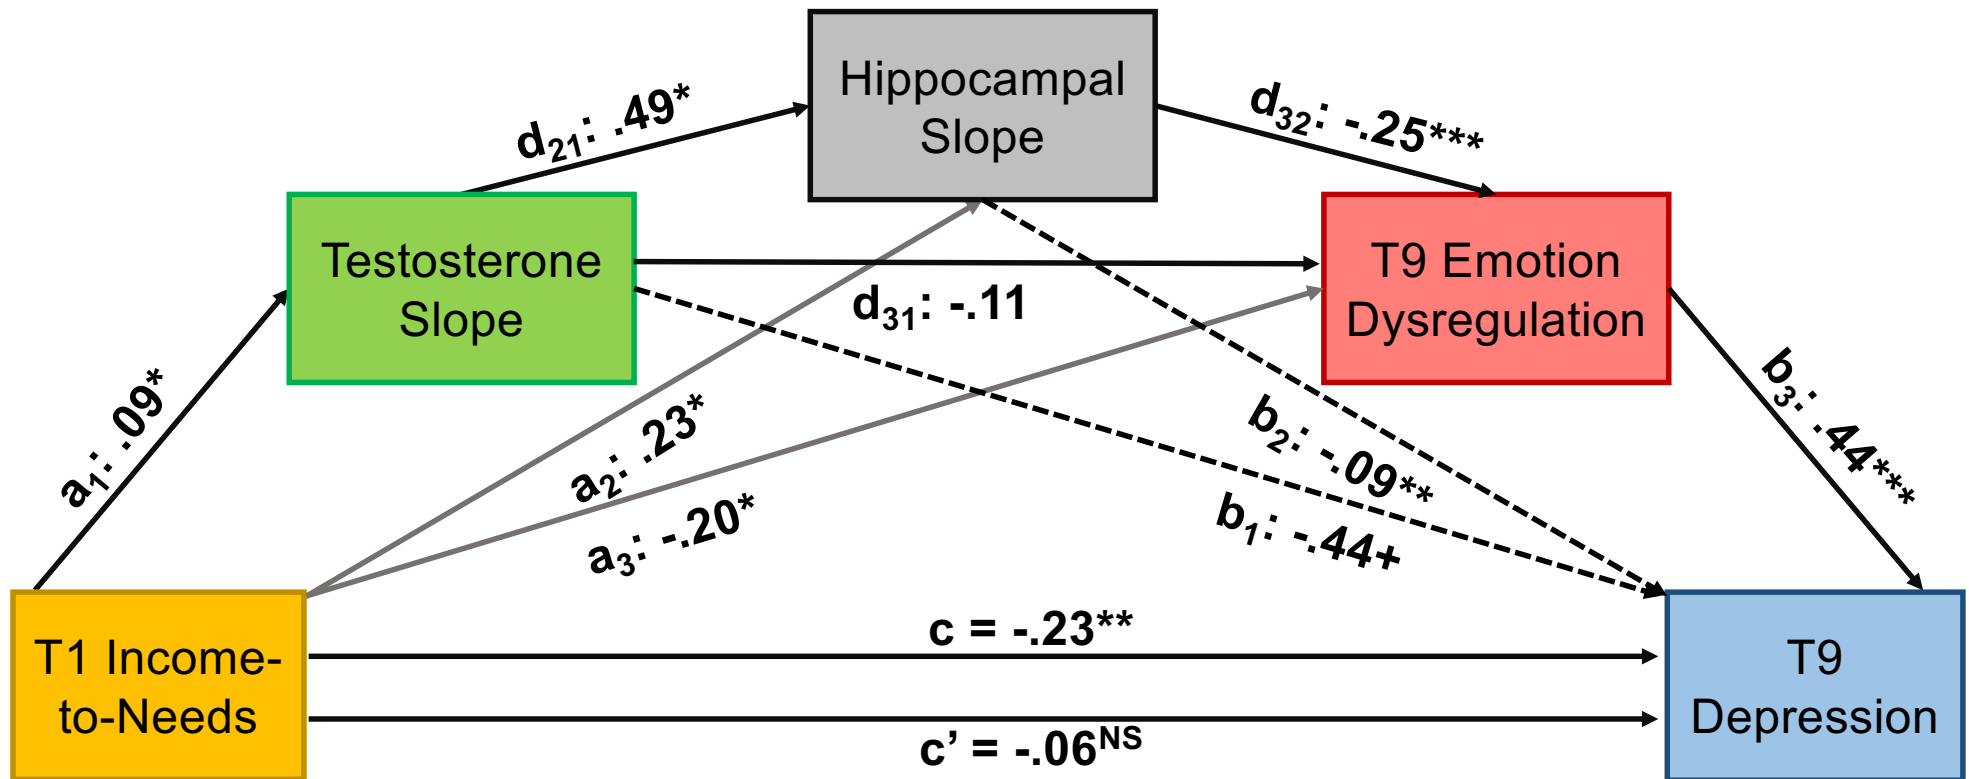

+  $p < .10$ ; \*  $p < .05$ ; \*\*  $p < .01$ ; \*\*\*  $p < .005$ ;

Covariates = Depression at T1 & Age at T9 & Gender

### Significant Indirect Effects

|                    |   |              |   |                   |   |                       |   |            |                                                                       |
|--------------------|---|--------------|---|-------------------|---|-----------------------|---|------------|-----------------------------------------------------------------------|
| T1 Income-to-Needs | → | Testosterone | → | Hippocampal Slope | → | Emotion Dysregulation | → | Depression | Effect = $-.0047$<br>+/-95% BOOT CI = $-.0173 \leftrightarrow -.0004$ |
| T1 Income-to-Needs | → | Testosterone | → | Hippocampal Slope |   |                       | → | Depression | Effect = $.0106$<br>+/-95% BOOT CI = $.0009 \leftrightarrow .0352$    |
| T1 Income-to-Needs |   |              | → | Hippocampal Slope |   |                       | → | Depression | Effect = $.0577$<br>+/-95% BOOT CI = $.013 \leftrightarrow .1271$     |
| T1 Income-to-Needs |   |              | → | Hippocampal Slope | → | Emotion Dysregulation | → | Depression | Effect = $-.0254$<br>+/-95% BOOT CI = $-.0701 \leftrightarrow -.0063$ |
| T1 Income-to-Needs |   |              |   |                   | → | Emotion Dysregulation | → | Depression | Effect = $-.0898$<br>+/-95% BOOT CI = $-.2005 \leftrightarrow -.0204$ |

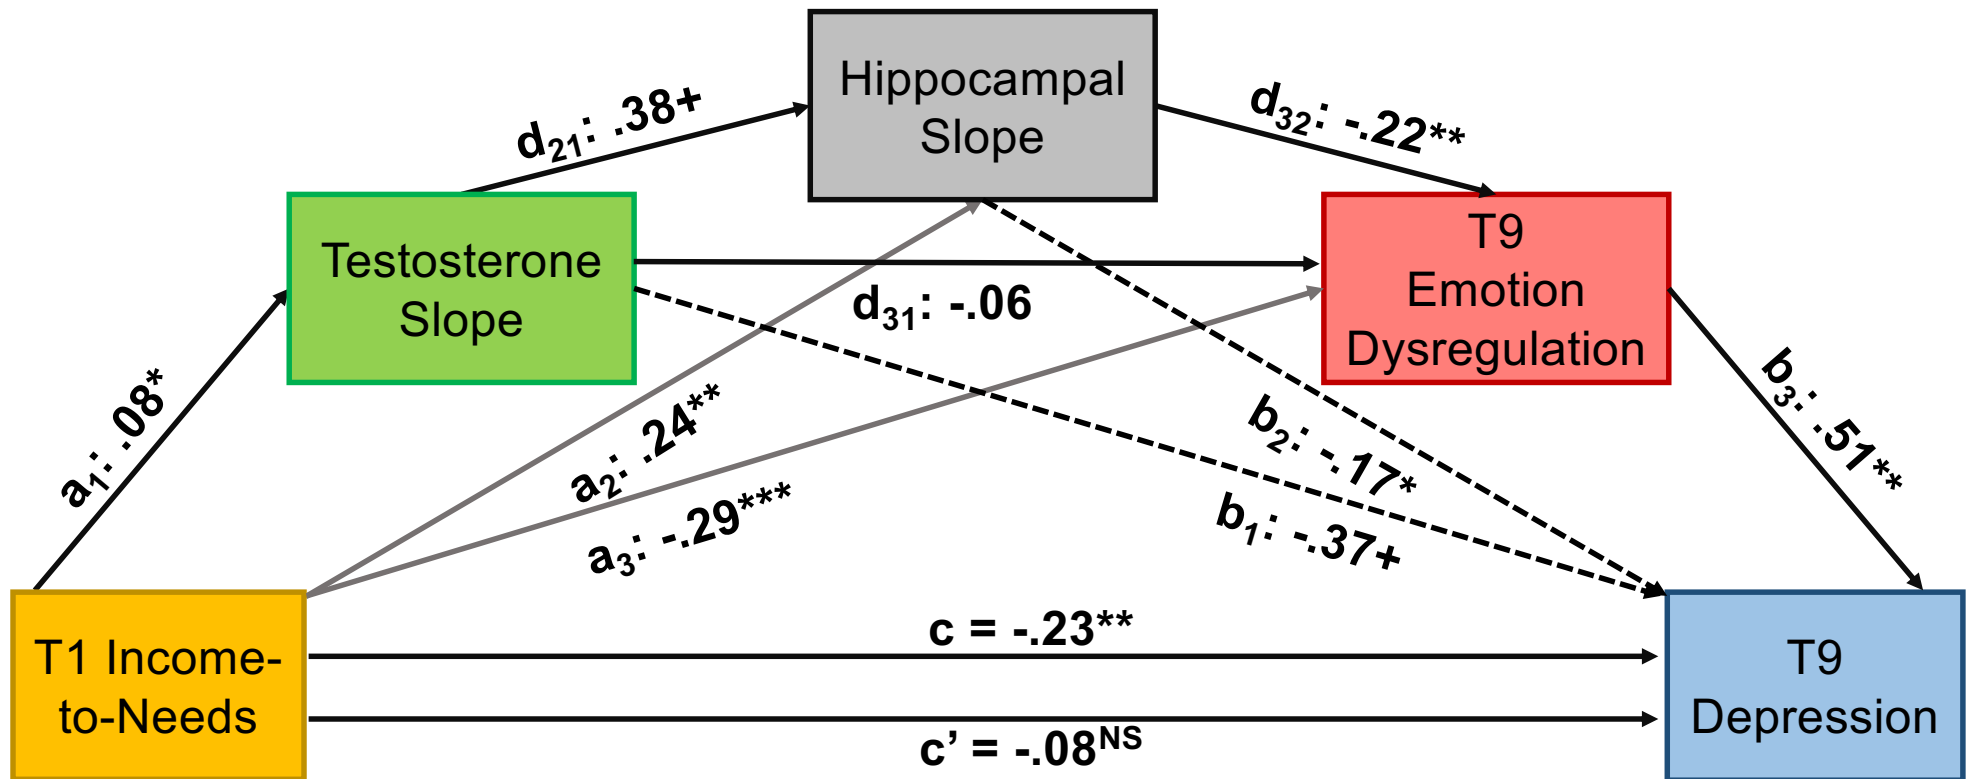

+  $p < .10$ ; \*  $p < .05$ ; \*\*  $p < .01$ ; \*\*\*  $p < .005$ ;

Covariates = Age at T9, Gender & Pubertal Status at T9

### Significant Indirect Effects

|                    |   |              |   |                   |   |                       |   |            |                                                                       |
|--------------------|---|--------------|---|-------------------|---|-----------------------|---|------------|-----------------------------------------------------------------------|
| T1 Income-to-Needs | → | Testosterone | → | Hippocampal Slope | → | Emotion Dysregulation | → | Depression | Effect = $-.0033$<br>+/-95% BOOT CI = $-.0125 \leftrightarrow -.0004$ |
| T1 Income-to-Needs | → | Testosterone | → | Hippocampal Slope |   |                       | → | Depression | Effect = $.0052$<br>+/-95% BOOT CI = $.0005 \leftrightarrow -.0199$   |
| T1 Income-to-Needs |   |              | → | Hippocampal Slope |   |                       | → | Depression | Effect = $.0406$<br>+/-95% BOOT CI = $.0076 \leftrightarrow .1060$    |
| T1 Income-to-Needs |   |              | → | Hippocampal Slope | → | Emotion Dysregulation | → | Depression | Effect = $-.0256$<br>+/-95% BOOT CI = $-.0659 \leftrightarrow -.0079$ |
| T1 Income-to-Needs |   |              |   |                   | → | Emotion Dysregulation | → | Depression | Effect = $-.1457$<br>+/-95% BOOT CI = $-.2753 \leftrightarrow -.0583$ |



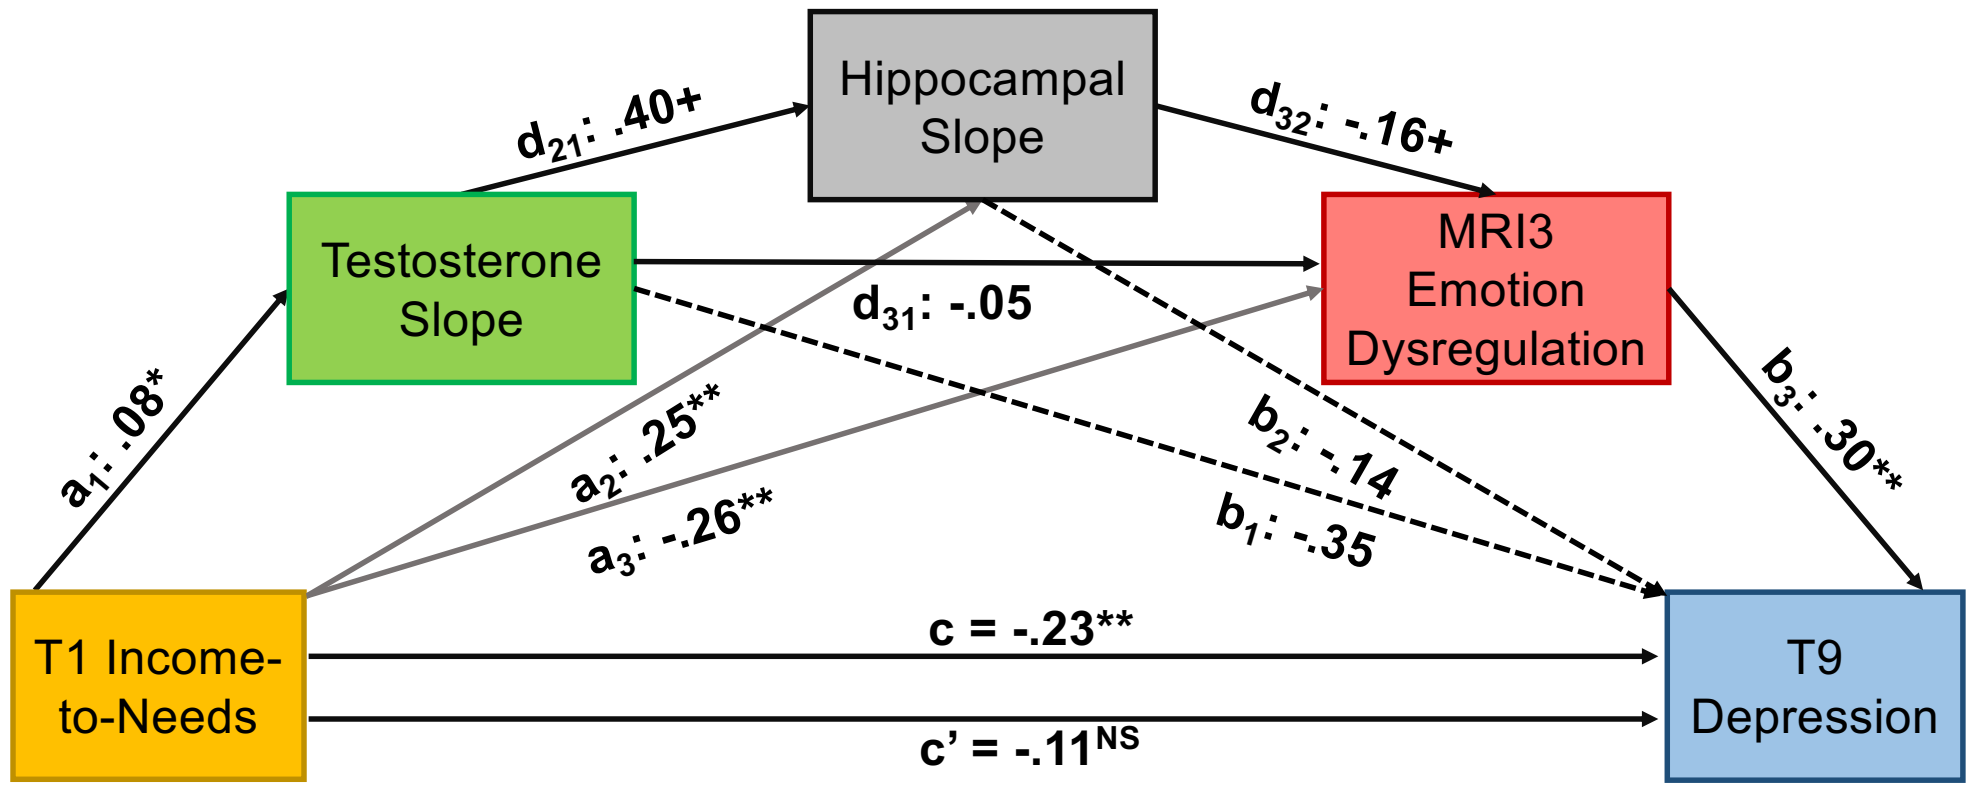

+  $p < .10$ ; \*  $p < .05$ ; \*\*  $p < .01$ ; \*\*\*  $p < .005$ ;  
 Covariates = Age at T9 & Gender

### Significant Indirect Effects

|                    |   |              |   |                   |   |                       |   |            |                                                     |
|--------------------|---|--------------|---|-------------------|---|-----------------------|---|------------|-----------------------------------------------------|
| T1 Income-to-Needs | → | Testosterone | → | Hippocampal Slope | → | Emotion Dysregulation | → | Depression | Effect = -.0016<br>+/-95% BOOT CI = -.0092 ↔ -.0001 |
| T1 Income-to-Needs | → | Testosterone | → | Hippocampal Slope |   |                       | → | Depression | Effect = .0046<br>+/-95% BOOT CI = .0001 ↔ -.0225   |
| T1 Income-to-Needs |   |              | → | Hippocampal Slope |   |                       | → | Depression | Effect = .0341<br>+/-95% BOOT CI = .0007 ↔ .0983    |
| T1 Income-to-Needs |   |              | → | Hippocampal Slope | → | Emotion Dysregulation | → | Depression | Effect = -.012<br>+/-95% BOOT CI = -.0432 ↔ -.0016  |
| T1 Income-to-Needs |   |              |   |                   | → | Emotion Dysregulation | → | Depression | Effect = -.0787<br>+/-95% BOOT CI = -.1805 ↔ -.0220 |
